# Supplementary material
Source: PubMed Central journal article supplement (PMC8447162)
Supplement: TBED-9999-0-s001.pdf [file TBED-9999-0-s001.pdf]

**Table S1;** qPCR Ct values of SARS-CoV-2 positive lion samples

| <b>Samples</b> | <b>Type</b> | <b>Day of collection</b> | <b>Gene 1 (E Gene)</b> | <b>Gene 2 (RdRP)</b> | <b>Gene 3 (HKU ORF)</b> |
|----------------|-------------|--------------------------|------------------------|----------------------|-------------------------|
| Lion 1         | Nasal Swab  | 1                        | 33.5                   | 34.0                 | 34.2                    |
| Lion 2         | Nasal Swab  | 1                        | 30.2                   | 31.3                 | 34.4                    |
| Lion 3         | Nasal Swab  | 1                        | 26.8                   | 25.4                 | 26.7                    |
| Lion 1         | Rectal Swab | 1                        | 34.5                   | 33.2                 | 34.1                    |
| Lion 2         | Rectal Swab | 1                        | 29.9                   | 32.2                 | 33.6                    |
| Lion 3         | Rectal Swab | 1                        | 29.4                   | 27.1                 | 28.1                    |
| Lion 1         | Nasal Swab  | 4                        | 24.1                   | 25.5                 | 24.9                    |
| Lion 2         | Nasal Swab  | 4                        | 34.4                   | 34.1                 | 33.9                    |
| Lion 3         | Nasal Swab  | 4                        | 29.8                   | 32.5                 | 33.6                    |
| Lion 1         | Rectal Swab | 4                        | 27.9                   | 26.3                 | 29.1                    |
| Lion 2         | Rectal Swab | 4                        | 34.1                   | 33.9                 | 33.4                    |
| Lion 3         | Rectal Swab | 4                        | 30.1                   | 29.8                 | 28.9                    |
| Lion 1         | Nasal Swab  | 21                       | No Ct                  | No Ct                | No Ct                   |
| Lion 2         | Nasal Swab  | 21                       | No Ct                  | No Ct                | No Ct                   |
| Lion 3         | Nasal Swab  | 21                       | No Ct                  | No Ct                | No Ct                   |
| Lion 1         | Rectal Swab | 21                       | No Ct                  | No Ct                | No Ct                   |
| Lion 2         | Rectal Swab | 21                       | No Ct                  | No Ct                | No Ct                   |
| Lion 3         | Rectal Swab | 21                       | No Ct                  | No Ct                | No Ct                   |

**Table S2:** List of primers and probes used in the study. The primers/ probe targeting E, RdRP and HKU were used for detection of SARS-CoV2. Whereas other sets of primers were used for amplification of respective genes and sequencing in Sanger sequencing methods.

| Name      | Sequence                               | Target location | Purpose                                       | REF                       |
|-----------|----------------------------------------|-----------------|-----------------------------------------------|---------------------------|
| fwd_E     | ACAGGTACGTTAATAGTTAAT<br>AGCGT         | E gene          | Detection of<br>Seba group of<br>Corona virus | WHO                       |
| rev_E     | ATATTGCAGCAGTACGCACAC<br>A             |                 |                                               |                           |
| E-probe   | 6FAM<br>ACACTAGCCATCCTTACTGCG<br>CTTCG |                 |                                               |                           |
| Rdrp_F    | GTGARATGGTCATGTGTGGCG<br>G             | RdRP gene       | Confirmatory<br>assay for<br>SARS-CoV2        | WHO                       |
| Rdrp_R    | CARATGTAAASACACTATTA<br>GCATA          |                 |                                               |                           |
| RdRPprobe | Cy5-<br>CAGGTGGAACCTCATCAGGAG<br>ATGC  |                 |                                               |                           |
| HKU_F     | TGGGGYTTTACRGGTAACCT                   | ORF1ab          | Confirmatory<br>assay for<br>SARS-CoV2        | WHO                       |
| HKU_R     | AACRCGCTTAACAAAGCACTC                  |                 |                                               |                           |
| HKUprobe  | VIC-<br>TAGTTGTGATGCWATCATGAC<br>TAG   |                 |                                               |                           |
| CV-EF1    | TGGGAATCTGGAGTAAAAGAC<br>TGT           | E gene          | Amplification<br>of complete E<br>gene        | Designed in<br>this study |
| CV-ER1    | AGTACCGTTGGAATCTGCCAT                  |                 |                                               |                           |
| CV-NF1    | GAATTGTGCGTGGATGAGGC                   | N Gene          | Amplification<br>of complete N<br>gene        | Designed in<br>this study |
| CV-NR1    | ATAGCCCATCTGCCTTGTGT                   |                 |                                               |                           |
| CV-S1F    | TATCTTGGCAAACCACGCGA                   | S Gene          | Amplification<br>of partial S<br>gene         | Designed in<br>this study |
| CV-S1R    | ACCAGCTGTCCAACCTGAAG                   |                 |                                               |                           |

|        |                      |  |                                 |                        |
|--------|----------------------|--|---------------------------------|------------------------|
| CV-S2F | TCTTCTTCAGGTTGGACAGC |  | Amplification of partial S gene | Designed in this study |
| CV-S2R | CTGTGGATCACGGACAGCAT |  |                                 |                        |
| CV-S3F | CTATCAGGCCGGTAGCACAC |  | Amplification of partial S gene | Designed in this study |
| CV-S3R | CGCCAACAATAAGCCATCCG |  |                                 |                        |
| CVR3   | ACACCATGAGGTGCTGACTG |  | Sequencing of CVR3              | Designed in this study |

**Table S3. Comparison of nucleotide and amino acid mutations between SARS-CoV-2 strains**

| <b>Nucleotide Position</b> | <b>Subject</b> | <b>Tripur_Amino acid change</b> |
|----------------------------|----------------|---------------------------------|
| 65                         | Lion 1         |                                 |
| 210                        | Both Lions     | -                               |
| 241                        | Both Lions     | -                               |
| 1191                       | Lion 1         | Pro309Leu                       |
| 1267                       | Lion 1         | Gly334Gly                       |
| 3037                       | Both Lions     | Phe924Phe                       |
| 5184                       | Both Lions     | Pro1640Leu                      |
| 5539                       | Lion 3         | Gln1758Gln                      |
| 5784                       | Lion 3         | Thr1840Ile                      |
| 9891                       | Both Lions     | Ala3209Val                      |
| 11418                      | Both Lions     | Val3718Ala                      |
| 11514                      | Lion 3         | Thr3750Ile                      |
| 12946                      | Lion 1         | Tyr4227Tyr                      |
| 14408                      | Both Lions     | Pro4715Leu                      |
| 14829                      | Lion 3         | Met4855Ile                      |
| 15451                      | Both Lions     | Gly5063Ser                      |
| 16466                      | Both Lions     | Pro5401Leu                      |
| 16610                      | Lion 3         | Thr5449Asn                      |
| 18213                      | Lion 1         | Met5983Ile                      |
| 20262                      | Lion 1         | Leu6666Leu                      |
| 20320                      | Lion 1         | His6686Tyr                      |
| 21618                      | Both Lions     | Thr19Arg                        |
| 21622                      | Lion 1         | Thr20Thr                        |
| 22227                      |                | Ala222Val                       |
| 22917                      | Both Lions     | Leu452Arg                       |
| 22995                      | Both Lions     | Thr478Lys                       |
| 23403                      | Both Lions     | Asp614Gly                       |
| 23604                      | Both Lions     | Pro681Arg                       |
| 24745                      | Lion 1         | Val1061Val                      |
| 25469                      | Both Lions     | Ser26Leu                        |
| 26767                      | Both Lions     | Ile82Thr                        |
| 27638                      | Both Lions     | Val82Ala                        |
| 27739                      | Lion 1         | Leu116Phe                       |
| 27752                      | Both Lions     | Thr120Ile                       |
| 28253                      | Lion 1         | Phe120Leu                       |
| 28881                      | Lion 3         | Arg203Met                       |
| 29320                      | Lion 3         | Gln349His                       |
| 29402                      | Both Lions     | Asp377Tyr                       |
| 29427                      | Lion 1         | Arg385Lys                       |
| 29742                      | Both Lions     | -                               |
